# Supplementary material for: DHX15 is required to control RNA virus-induced intestinal inflammation
Source: PubMed Central journal article supplement — Cell Rep. Author manuscript; Available in PMC 2021 Jul 13. (PMC8276442; doi:10.1016/j.celrep.2021.109205), 2021-06-22
Supplement: NIHMS1717851-supplement-1.pdf [file NIHMS1717851-supplement-1.pdf]

**Cell Reports, Volume 35**

**Supplemental information**

**DHX15 is required to control RNA  
virus-induced intestinal inflammation**

**Junji Xing, Xiaojing Zhou, Mingli Fang, Evan Zhang, Laurie J. Minze, and Zhiqiang Zhang**

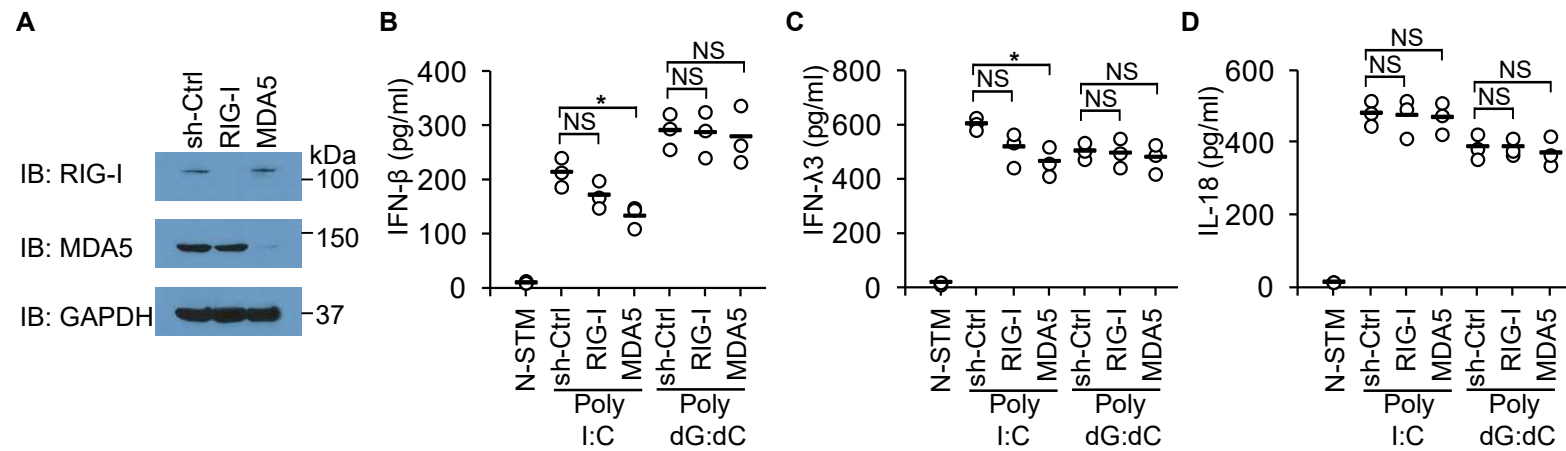

**Figure S1. RIG-I and MDA5 play a marginal role in producing IFN- $\beta$ , IFN- $\lambda$ 3 and IL-18 by human HT-29 IECs after stimulation with poly I:C and poly dG:dC. Related to Figure 1.**

**(A)** Immunoblot (IB) showing the knockdown efficiency of shRNAs targeting the indicated genes in HT-29 IECs. Nontargeting shRNA served as a control (sh-Ctrl). GAPDH blots are shown as loading controls. The position of protein markers (shown in kDa) is indicated on the right.

**(B-D)** ELISA of IFN- $\beta$  **(B)**, IFN- $\lambda$ 3 **(C)** and IL-18 **(D)** production from human HT-29 IECs with the indicated shRNA after a 20 h stimulation with 5  $\mu$ g/ml poly I:C or 2.5  $\mu$ g/ml poly dG:dC delivered by Lipofectamine 3000. N-STIM, scrambled shRNA-treated HT-29 IECs without stimulation. Each circle represents an individual independent experiment and small solid black lines indicate the average of triplicates. NS,  $P > 0.05$ , \* $P < 0.05$  (unpaired t test).

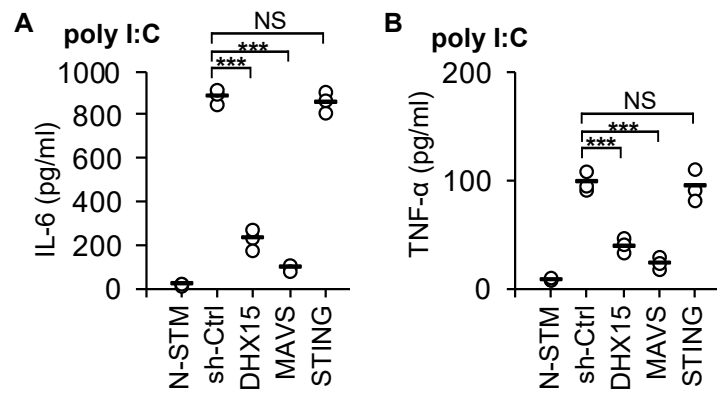

**Figure S2. DHX15 positively regulates production of proinflammatory cytokines IL-6 and TNF- $\alpha$  in human HT-29 IECs after poly I:C stimulation. Related to Figure 1.**

(**A-B**) ELISA of IL-6 (**A**) and TNF- $\alpha$  (**B**) production from human HT-29 IECs with the indicated shRNA after a 20 h stimulation with 5  $\mu$ g/ml poly I:C delivered by Lipofectamine 3000. N-STM, scrambled shRNA-treated HT-29 IECs without stimulation. Nontargeting shRNA served as a control (sh-Ctrl). Each circle represents an individual independent experiment and small solid black lines indicate the average of triplicates. NS,  $P > 0.05$ , \*\*\* $P < 0.001$  (unpaired t test).

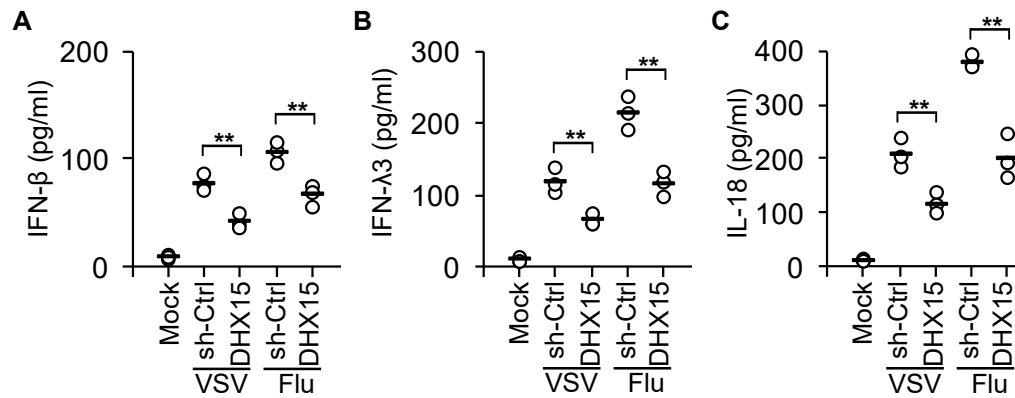

**Figure S3. DHX15 is required for IFN-β, IFN-λ3 and IL-18 production in human HT-29 IECs after infection with non-enteric RNA viruses.**

**Related to Figure 2.**

(**A-C**) ELISA of IFN-β (**A**), IFN-λ3 (**B**) and IL-18 (**C**) production from human HT-29 IECs with the indicated shRNA after a 20 h infection with non-enteric RNA viruses including vesicular stomatitis virus Indiana strain (VSV) and influenza A virus PR8 strain (Flu) at a multiplicity of infection (MOI) of 10. Mock, scrambled shRNA(sh-Ctrl)-treated human HT-29 IECs without virus infection. Each circle represents an individual independent experiment and small solid black lines indicate the average of triplicates. \*\*0.001<P<0.01 (unpaired t test).

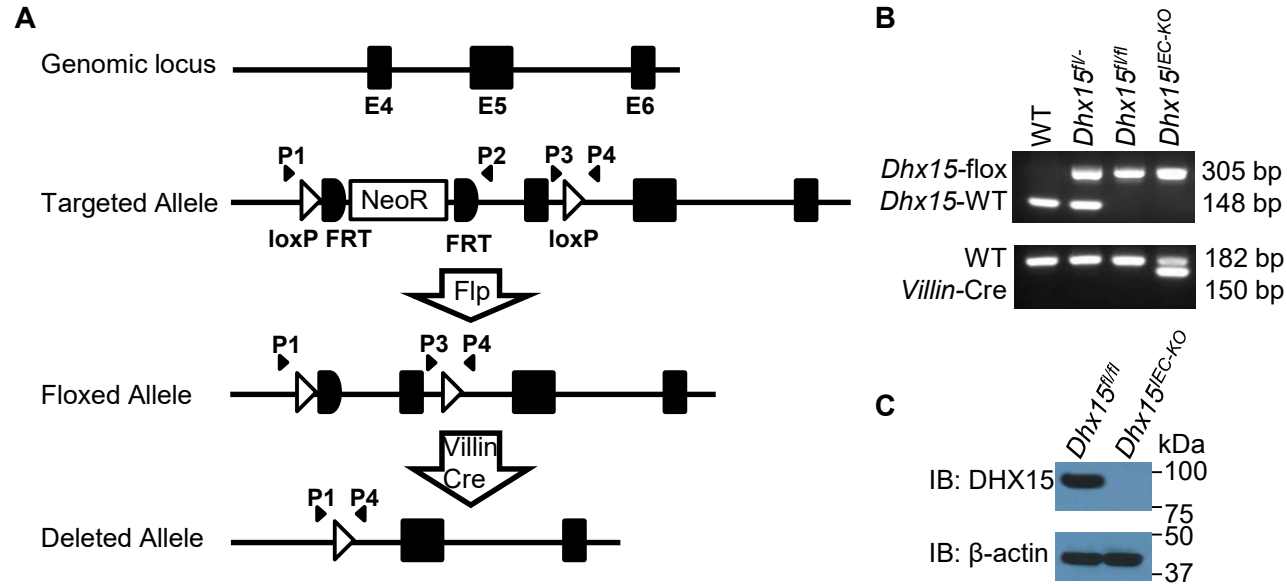

**Figure S4. Dhx15 gene targeting. Related to Figure 3.**

(A) Schematic picture of *Dhx15* gene targeting using an FRT-LoxP vector, showing the exons 4 to 6 of *Dhx15* gene. Targeted mice were crossed with FRT deleter (*Rosa26-FLPe*) mice to generate *Dhx15*-floxed (*Dhx15<sup>fl/fl</sup>*) mice, which were further crossed with *Villin-Cre* transgenic mice to generate IEC-specific *Dhx15*-knockout mice, *Dhx15<sup>fl/fl</sup>; Villin-Cre* (*Dhx15<sup>IEC-KO</sup>*).

(B) Genotyping PCR to amplify the *Dhx15*-flox (using P1/P2 primer pair) and WT (using P1/P2 primer pair) alleles (top), or the *Villin-Cre* (using 16775/oIMR9074 primer pair) and WT (using 16775/16776 primer pair) alleles (bottom).

(C) Immunoblot (IB) of DHX15 in mouse primary IECs from wild-type *Dhx15<sup>fl/fl</sup>* and *Dhx15<sup>IEC-KO</sup>* mice. The position of protein markers (shown in kDa) is indicated on the right.

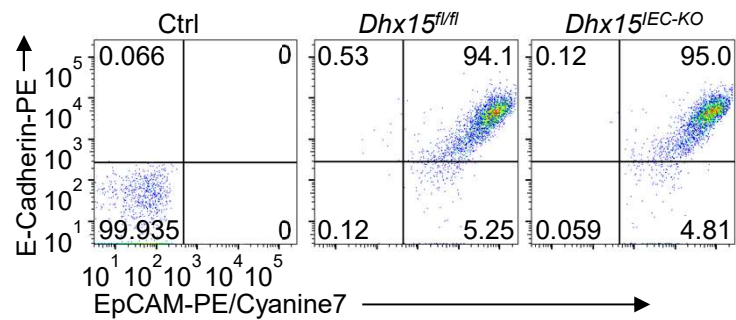

**Figure S5. DHX15 does not affect expression of differentiation markers EpCAM and E-Cadherin in mouse IECs. Related to Figure 3.**

Flow cytometry analyzing the expression of differentiation markers EpCAM and E-Cadherin in the mouse primary IECs isolated from wild-type *Dhx15<sup>fl/fl</sup>* and *Dhx15<sup>IEC-KO</sup>* mice using isotype control antibodies (Control, Ctrl), EpCAM-PE/Cyanine7 and E-Cadherin-PE antibodies. Flow cytometry data were acquired on a LSR-II flow cytometer (Beckton Dickinson) and analyzed using FlowJo v10 software (Tree Star).

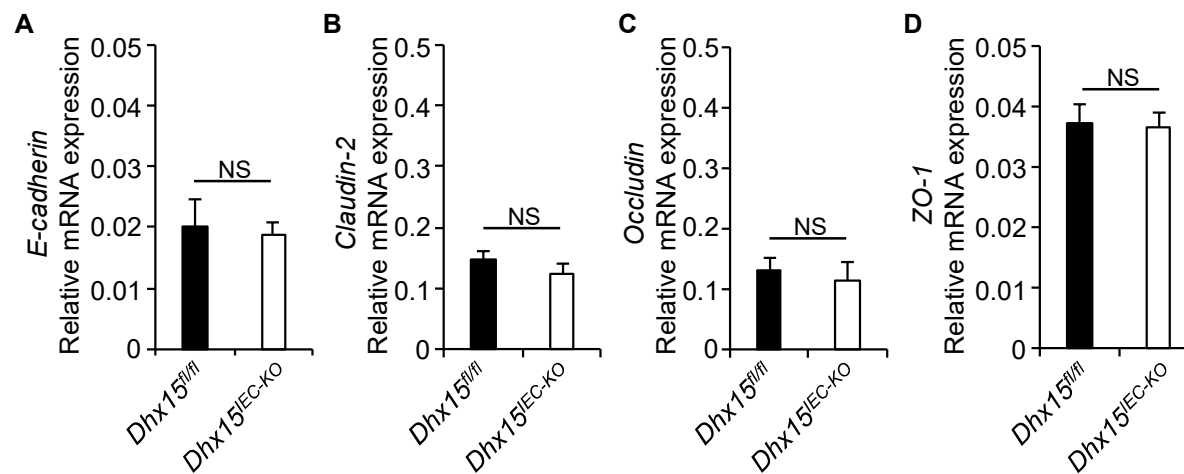

**Figure S6. IEC-specific DHX15 ablation does not affect expression of epithelial tight junction proteins. Related to Figure 3.**

(A-D) The qRT-PCR analysis of the expression of tight junction-related genes E-cadherin (A), Claudin-2 (B), Occludin (C), and Zonula occludens-1 (ZO-1, D) in the mouse primary IECs isolated from wild-type *Dhx15<sup>fl/fl</sup>* and *Dhx15<sup>IEC-KO</sup>* mice. mRNA, messenger RNA. NS, not significant.

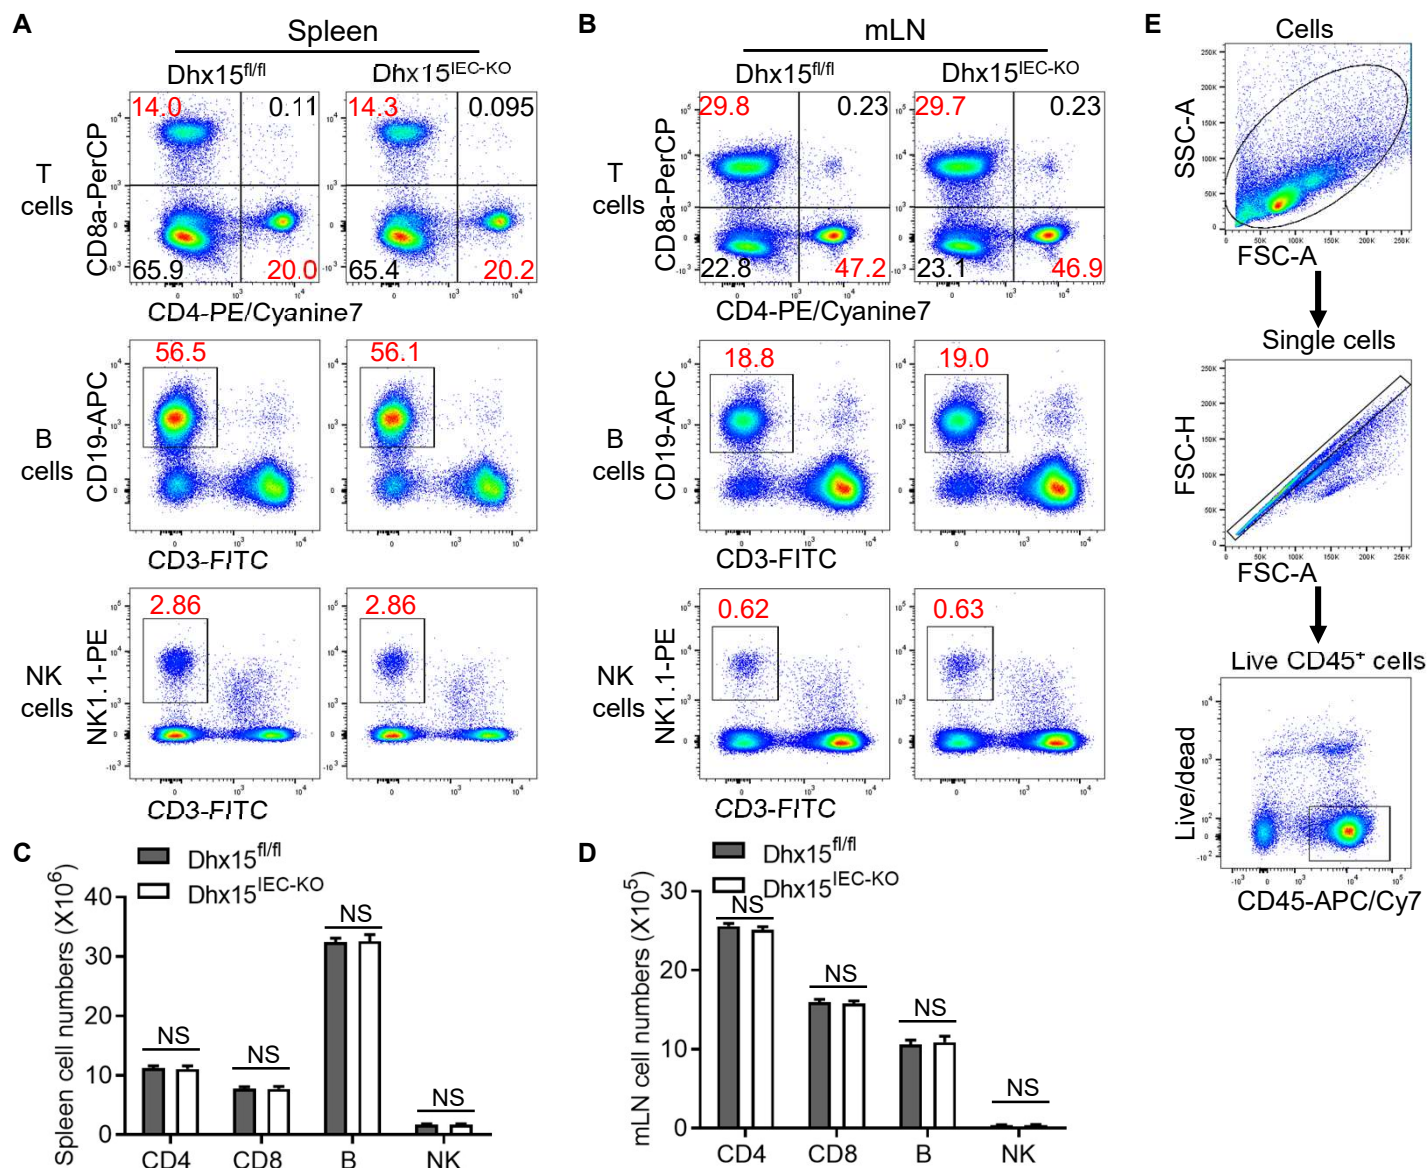

**Figure S7. IEC-specific DHX15 deficiency does not affect immune cell subsets frequencies in spleen and mLN. Related to Figure 3.**

(A-B) Flow cytometry analysis of CD4<sup>+</sup> T cells, CD8<sup>+</sup> T cells, B cells, and NK cells of spleen cells (A) and mesenteric lymph nodes (mLN) (B) from wild-type *Dhx15<sup>fl/fl</sup>* and *Dhx15<sup>IEC-KO</sup>* mice using CD3-FITC, CD4-PE/Cyanine7, CD8a-PerCP/Cyanine5.5, CD19-APC and NK1.1-PE antibodies.

(C-D) The absolute cell numbers in spleen (C) and mLN (D) from wild-type *Dhx15<sup>fl/fl</sup>* and *Dhx15<sup>IEC-KO</sup>* mice (n=3 mice) for representative flow cytometry data in A and B. NS, not significant (unpaired t test).

(E) Representative FACS plots showing the gating strategy for analyzing T, B, and NK cell population in spleen of the mice. Flow cytometry data were acquired on a LSR-II flow cytometer (Beckton Dickinson) and analyzed using FlowJo v10 software (Tree Star).



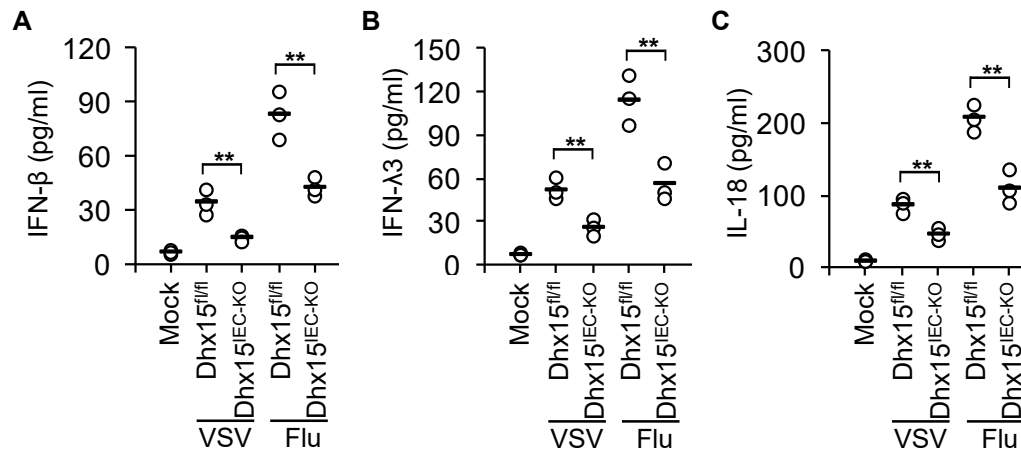

**Figure S8. DHX15 positively regulates production of IFN- $\beta$ , IFN- $\lambda$ 3 and IL-18 in mouse primary IECs after infection with non-enteric RNA viruses. Related to Figure 3.**

(A-C) ELISA of IFN- $\beta$  (A), IFN- $\lambda$ 3 (B) and IL-18 (C) production in mouse primary IECs from wild-type *Dhx15<sup>fl/fl</sup>* and *Dhx15<sup>IEC-KO</sup>* mice after a 20 h infection with non-enteric RNA viruses including vesicular stomatitis virus Indiana strain (VSV) and influenza A virus PR8 strain (Flu) at a multiplicity of infection (MOI) of 10. Mock, cells without virus infection. Each circle represents an individual independent experiment and small solid black lines indicate the average of triplicates. \*\*0.001 < P < 0.01 (unpaired t test).

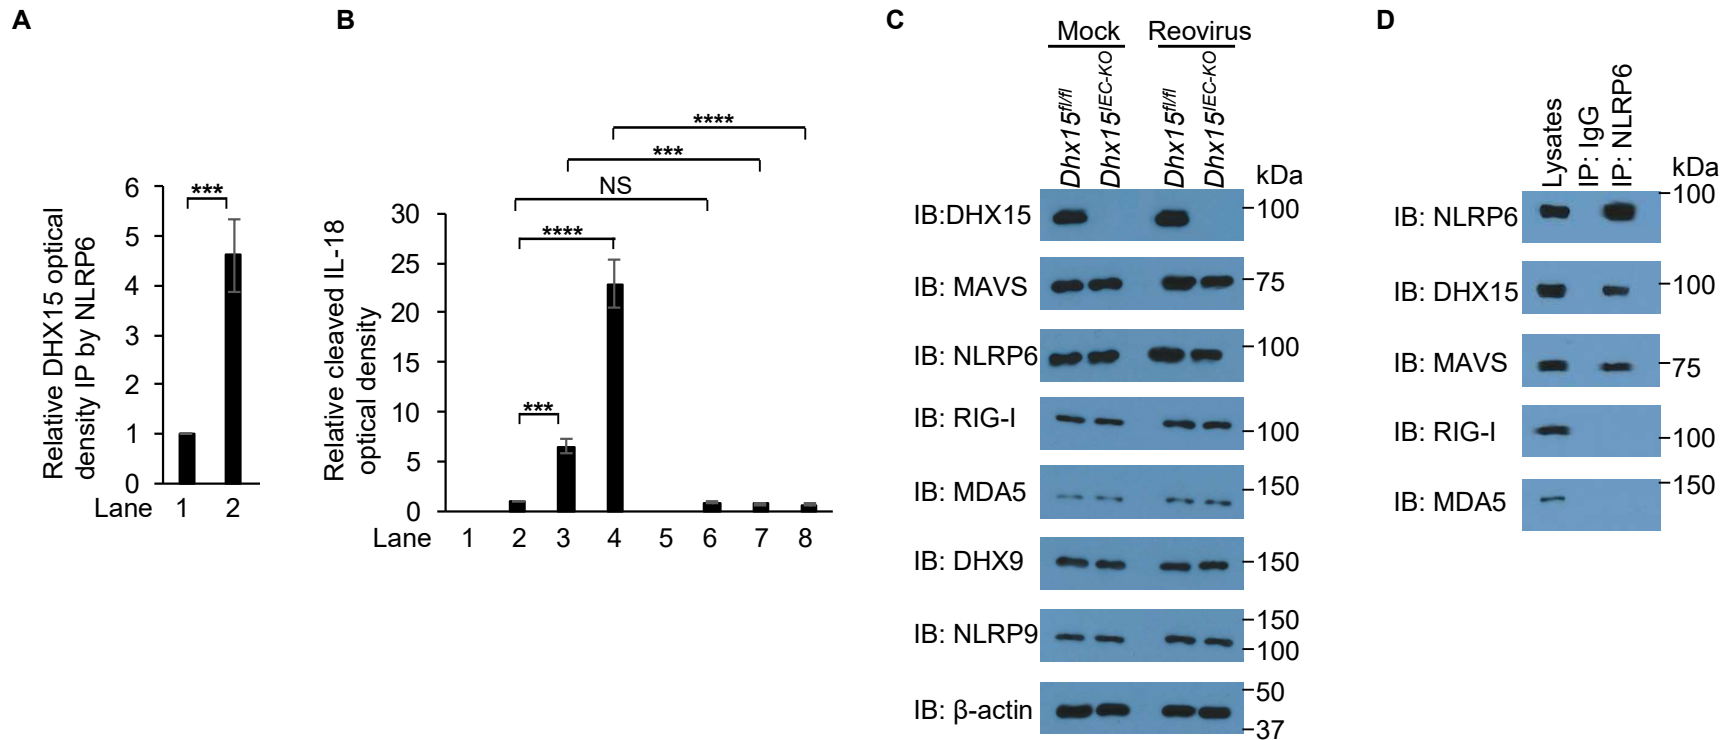

**Figure S9. DHX15 recruits MAVS and NLRP6 to form signaling complex in mouse IECs after reovirus infection. Related to Figure 6.**

(A) Quantification of immunoblot bands of DHX15 immunoprecipitated (IP) by NLRP6 in top panel of Fig. 6A expressed as relative to lane 1 using the densitometric analysis by ImageJ software; n=3 blots.

(B) Quantification of immunoblot bands of cleaved IL-18 in fifth panel of Fig. 6E expressed as relative to lane 2 using the densitometric analysis by ImageJ software; n=3 blots. NS, not significant, \*\*\*P<0.001, \*\*\*\*P<0.0001 (unpaired t test).

(C) Immunoblot (IB) analysis of the expression of RNA sensors including DHX15, DHX9, RIG-I and MDA5 and adaptors including MAVS, NLRP6 and NLRP9 in mouse primary IECs from wild-type *Dhx15<sup>fl/fl</sup>* and *Dhx15<sup>IEC-KO</sup>* mice without or with reovirus infection at MOI of 1 for 1 hour.

(D) Immunoblot analysis of endogenous proteins of NLRP6, DHX15, MAVS, RIG-I and MDA5 precipitated with anti-NLRP6 or control IgG from whole-cell lysates of mouse IECs from wild-type *Dhx15<sup>fl/fl</sup>* mice infected with reovirus at MOI of 10 for 6 hours. The position of protein markers (shown in kDa) is indicated on the right.

**Table S1. Primers for qRT-PCR and genotype PCR used in this study. Related to STAR Methods.**

| Gene                    | Sequence                                                               |
|-------------------------|------------------------------------------------------------------------|
| qRT-PCR                 |                                                                        |
| Human <i>Gapdh</i>      | F: 5'- GGAGCGAGATCCCTCCAAAAT -3'<br>R: 5'- GGCTGTTGTCATACTTCTCATGG -3' |
| Mouse <i>Ifnb</i>       | F: 5'- CCCTATGGAGATGACGGAGA -3'<br>R: 5'- TCCCACGTCAATCTTTCCTC -3'     |
| Mouse <i>Ifnl2/3</i>    | F: 5'- AGTGGAAGCAAAGGATTG -3'<br>R: 5'- GAGATGAGGTGGGAACTG -3'         |
| Mouse <i>Ii18</i>       | F: 5'- GCCTCAAACCTTCCAAATCA -3'<br>R: 5'- TGGATCCATTTCTCAAAGG -3'      |
| Mouse <i>Gapdh</i>      | F: 5'- AGGTCGGTGTGAACGGATTTG -3'<br>R: 5'- TGTAGACCATGTAGTTGAGGTCA -3' |
| Mouse <i>Hprt</i>       | F: 5'- CACAGGACTAGAACACCTGC -3'<br>R: 5'- GCTGGTGAAAAGGACCTCT -3'      |
| Mouse <i>E-cadherin</i> | F: 5'- CACCTGGAGAGAGGCCATGT -3'<br>R: 5'- TGGGAAACATGAGCAGCTCT -3'     |
| Mouse <i>Claudin-2</i>  | F: 5'- TATGTTGGTGCCAGCATTGT -3'<br>R: 5'- TCATGCCACCACAGAGATA -3'      |
| Mouse <i>Occludin</i>   | F: 5'- CCTCCAATGGCAAAGTGAAT -3'<br>R: 5'- CTCCCCACCTGTCGTGTAGT -3'     |
| Mouse <i>ZO-1</i>       | F: 5'- CCACCTCTGTCCAGCTCTC -3'<br>R: 5'- CACCGGAGTGATGGTTTTCT -3'      |
| Mouse $\beta$ -actin    | F: 5'- CGTGAAAAGATGACCCAGATCA -3'<br>R: 5'- CACAGCCTGGATGGCTACGT -3'   |
| Rotavirus NSP5          | F: 5'- TTCTGCTTCAAACGAYCCACTC -3'<br>R: 5'- GAGAAATCYACTTGRTCGCA -3'   |
| Reovirus S4             | F: 5'- GGAACATTGTGAGAGCAGCA -3'<br>R: 5'- GCAAGCTAGTGGAGGCAGTC -3'     |
| HSV-1 VP16              | F: 5'- TCGGCGTGGAAGAAACGAGAGA -3'<br>R: 5'- CGAACGCACCCAAATCGACA -3'   |
| Dhx15 genotype PCR      |                                                                        |
| P1                      | 5'-CACCCAAGTATCAGTATTCTCACG -3'                                        |
| P2                      | 5'-GCAATAATGTAACACAGCTAACAGC -3'                                       |
| P3                      | 5'-GATTGGTTTCTCTAATTGCTAGCC -3'                                        |
| P4                      | 5'-CACTGTGTGAGTTCAAGAATCACC -3'                                        |
| Villin-Cre genotype PCR |                                                                        |
| Common primer 16775     | 5'-GCCTTCTCCTCTAGGCTCGT -3'                                            |
| WT primer 16776         | 5'-TATAGGGCAGAGCTGGAGGA -3'                                            |
| Mutant primer oIMR9074  | 5'-AGGCAAATTTTGGTGTACGG -3'                                            |
